# Supplementary material for: Characterization of enterovirus 71 infection and associated outbreak of Hand, Foot, and Mouth Disease in Shawo of China in 2012
Source: PubMed Central journal article supplement (PMC5150535; doi:10.1038/srep38451), 2016-12-12
Supplement: srep38451-s1.pdf [file srep38451-s1.pdf]

# **Characterization of enterovirus 71 infection and associated outbreak of Hand, Foot, and Mouth Disease in Shawo of China in 2012**

Michelle Y. Liu<sup>1,2,3#</sup>, Jin Liu<sup>2#</sup>, Weijian Lai<sup>1,4,5</sup>, Jun Luo<sup>2</sup>, Yingle Liu<sup>2</sup>, Gia-Phong Vu<sup>3</sup>, Zhu Yang<sup>4,5</sup>, Phong Trang<sup>3</sup>, Hongjian Li<sup>1\*</sup>, Jianguo Wu<sup>2\*</sup>

<sup>1</sup>College of Life Sciences, Jinan University, Guangzhou, Guangdong 510632, China

<sup>2</sup>State Key Laboratory of Virology, College of Life Sciences, Wuhan University, Wuhan, Hubei 430072, China

<sup>3</sup>School of Public Health, University of California, Berkeley, CA 94720

<sup>4</sup>Taizhou Institute of Virology, Taizhou, Jiangsu 225300, China

<sup>5</sup>Jiangsu Affynigen Biotechnologies, Inc., Taizhou, Jiangsu 225300, China

#These authors contribute equally to this study.

\*Correspondence should be addressed to:

Dr. Jianguo Wu

State Key Laboratory of Virology, College of Life Sciences, Wuhan University, Wuhan 430072, P.R. China, Tel: +86-27-68754001, E-mail: [jwu@whu.edu.cn](mailto:jwu@whu.edu.cn)

Dr. Hongjian Li

College of Life Sciences, Jinan University, Guangzhou, Guangdong 510632, China. Tel: +86-20-85220501, Email: [tlihj@jnu.edu.cn](mailto:tlihj@jnu.edu.cn)

## SUPPLEMENTAL INFORMATION

Table S1. Quantitative RT-PCR detection of the EV-A71, CV-A16, and human enterovirus universal (EVU) sequences in the HFMD samples.

| Number  | EV-A71         | CV-A16   | EVU      |
|---------|----------------|----------|----------|
| SW12001 | — <sup>a</sup> | —        | —        |
| SW12002 | —              | —        | —        |
| SW12003 | —              | —        | —        |
| SW12004 | positive       | —        | positive |
| SW12005 | positive       | positive | positive |
| SW12006 | positive       | positive | positive |
| SW12007 | positive       | positive | positive |
| SW12008 | —              | —        | —        |
| SW12009 | —              | —        | —        |
| SW12010 | —              | —        | —        |
| SW12011 | —              | —        | —        |
| SW12012 | —              | positive | positive |
| SW12013 | positive       | positive | positive |
| SW12014 | positive       | —        | positive |
| SW12015 | positive       | —        | positive |
| SW12016 | —              | positive | positive |
| SW12017 | positive       | positive | positive |
| SW12018 | —              | —        | —        |
| SW12019 | —              | —        | —        |
| SW12020 | positive       | —        | positive |
| SW12021 | —              | —        | —        |
| SW12022 | —              | positive | positive |
| SW12023 | positive       | —        | positive |
| SW12024 | —              | —        | —        |
| SW12025 | —              | —        | —        |
| SW12026 | —              | —        | —        |
| SW12027 | —              | —        | positive |
| SW12028 | positive       | —        | positive |
| SW12029 | positive       | —        | positive |
| SW12030 | —              | positive | positive |
| SW12031 | positive       | —        | positive |
| SW12032 | positive       | —        | positive |
| SW12033 | —              | —        | —        |

|         |          |          |          |
|---------|----------|----------|----------|
| SW12034 | —        | —        | —        |
| SW12035 | —        | —        | —        |
| SW12036 | —        | —        | —        |
| SW12037 | —        | —        | —        |
| SW12038 | —        | positive | positive |
| SW12039 | —        | positive | positive |
| SW12040 | —        | —        | positive |
| SW12041 | —        | —        | —        |
| SW12042 | —        | —        | —        |
| SW12043 | —        | —        | —        |
| SW12044 | —        | —        | —        |
| SW12045 | positive | —        | positive |
| SW12046 | —        | —        | —        |
| SW12047 | positive | —        | positive |
| SW12048 | positive | —        | positive |
| SW12049 | positive | —        | positive |
| SW12050 | positive | —        | positive |
| SW12051 | —        | —        | —        |
| SW12052 | positive | —        | positive |
| SW12053 | positive | —        | positive |
| SW12054 | positive | —        | positive |
| SW12055 | —        | —        | positive |
| SW12056 | —        | positive | positive |
| SW12057 | —        | —        | positive |
| SW12058 | positive | —        | positive |
| SW12059 | positive | —        | positive |
| SW12060 | —        | positive | positive |
| SW12061 | —        | —        | —        |
| SW12062 | positive | —        | positive |
| SW12063 | positive | —        | positive |
| SW12064 | —        | —        | —        |
| SW12065 | positive | —        | positive |
| SW12066 | —        | —        | positive |
| SW12067 | positive | —        | positive |
| SW12068 | —        | —        | positive |
| SW12069 | positive | —        | positive |
| SW12070 | —        | —        | —        |
| SW12071 | positive | —        | positive |
| SW12072 | —        | —        | positive |
| SW12073 | positive | positive | positive |
| SW12074 | positive | —        | positive |
| SW12075 | —        | —        | positive |
| SW12076 | positive | —        | positive |

|         |          |          |          |
|---------|----------|----------|----------|
| SW12077 | positive | —        | positive |
| SW12078 | —        | —        | —        |
| SW12079 | positive | —        | positive |
| SW12080 | —        | —        | positive |
| SW12081 | —        | —        | positive |
| SW12082 | positive | —        | positive |
| SW12083 | positive | —        | positive |
| SW12084 | —        | —        | —        |
| SW12085 | positive | positive | positive |
| SW12086 | —        | —        | —        |
| SW12087 | positive | —        | positive |
| SW12088 | positive | —        | positive |
| SW12089 | —        | —        | —        |
| SW12090 | —        | —        | —        |
| SW12091 | positive | positive | positive |
| SW12092 | positive | —        | positive |
| SW12093 | —        | —        | —        |
| SW12094 | positive | —        | positive |
| SW12095 | positive | —        | positive |
| SW12096 | —        | —        | —        |
| SW12097 | —        | —        | —        |
| SW12098 | —        | —        | —        |
| SW12099 | —        | —        | —        |
| SW12100 | —        | —        | —        |
| SW12101 | positive | —        | positive |
| SW12102 | positive | —        | positive |
| SW12103 | positive | —        | positive |
| SW12104 | positive | —        | positive |
| SW12105 | —        | —        | —        |

<sup>a</sup> Negative;
